# Supplementary material for: Pulsed laser polymerization–size exclusion chromatography investigations into backbiting in ethylhexyl acrylate polymerization
Source: Royal Society of Chemistry journal article supplement (doi:10.1039/d1py01533h), 2022-01-01
Supplement: d1py01533h1.pdf [file d1py01533h1.pdf]

Supporting Information to

## **Pulsed Laser Polymerization – Size Exclusion Chromatography Investigations into Backbiting in Ethylhexyl Acrylate Polymerization**

*Greg Quintens,<sup>a</sup> Tanja Junkers<sup>b\*</sup>*

<sup>a</sup>Universiteit Hasselt, Martelarenlaan 42, 3500 Hasselt, Belgium

<sup>b</sup>Polymer Reaction Design Group, Monash University, 19 Rainforest Walk, Clayton VIC 3800, Australia,  
email: [tanja.junkers@monash.edu](mailto:tanja.junkers@monash.edu)

All primary results from PLP experiments on EHA are collated in the supporting information section.  
Density function and Mark-Houwink-Kuhn-Sakurada parameters are taken from:

T. Junkers, M. Schneider-Baumann, S.P.S. Koo, P. Castignolles, and C. Barner-Kowollik, *Macromolecules* **2010**, *43*, 10427-10434.

**Table S1** Experimental details showing frequency ( $f$ ), number of pulses ( $n$ ), monomer density ( $\rho$ ), monomer concentration ( $C_M$ ), the molecular weight at the inflection points ( $M_1$  and  $M_2$ ) and the calculated propagation constant ( $k_p^{apparent}$ ) at 5° C

| $f$ / Hz | $n$  | $\rho$ / g·mL <sup>-1</sup> | $C_M$ / mol·L <sup>-1</sup> | $M_1$ / g·mol <sup>-1</sup> | $M_2$ / g·mol <sup>-1</sup> | $k_p^{apparent}$ / L·mol <sup>-1</sup> ·s <sup>-1</sup> |
|----------|------|-----------------------------|-----------------------------|-----------------------------|-----------------------------|---------------------------------------------------------|
| 10       | 50   | 0.89722                     | 4.8688                      | 226049                      |                             | 2519                                                    |
| 10       | 100  | 0.89722                     | 4.8688                      | 226354                      |                             | 2523                                                    |
| 10       | 150  | 0.89722                     | 4.8688                      | 350998                      |                             | 3912                                                    |
| 20       | 100  | 0.89722                     | 4.8688                      | 194083                      |                             | 4326                                                    |
| 20       | 300  | 0.89722                     | 4.8688                      | 214723                      |                             | 4786                                                    |
| 30       | 150  | 0.89722                     | 4.8688                      | 133044                      |                             | 4449                                                    |
| 30       | 200  | 0.89722                     | 4.8688                      | 147288                      |                             | 4925                                                    |
| 30       | 300  | 0.89722                     | 4.8688                      | 137306                      |                             | 4591                                                    |
| 40       | 250  | 0.89722                     | 4.8688                      | 100502                      |                             | 4481                                                    |
| 40       | 350  | 0.89722                     | 4.8688                      | 100233                      |                             | 4469                                                    |
| 50       | 150  | 0.89722                     | 4.8688                      | 101158                      |                             | 5637                                                    |
| 50       | 250  | 0.89722                     | 4.8688                      | 108705                      |                             | 6058                                                    |
| 50       | 350  | 0.89722                     | 4.8688                      | 106232                      |                             | 5920                                                    |
| 60       | 200  | 0.89722                     | 4.8688                      | 107978                      |                             | 7221                                                    |
| 60       | 300  | 0.89722                     | 4.8688                      | 100400                      |                             | 6714                                                    |
| 60       | 400  | 0.89722                     | 4.8688                      | 100027                      |                             | 6689                                                    |
| 70       | 200  | 0.89722                     | 4.8688                      | 96414                       |                             | 7522                                                    |
| 70       | 300  | 0.89722                     | 4.8688                      | 99555                       |                             | 7767                                                    |
| 70       | 400  | 0.89722                     | 4.8688                      | 100066                      |                             | 7807                                                    |
| 80       | 200  | 0.89722                     | 4.8688                      | 87198                       |                             | 7775                                                    |
| 80       | 300  | 0.89722                     | 4.8688                      | 87807                       |                             | 7829                                                    |
| 80       | 400  | 0.89722                     | 4.8688                      | 83107                       |                             | 7410                                                    |
| 90       | 200  | 0.89722                     | 4.8688                      | 80541                       |                             | 8079                                                    |
| 90       | 300  | 0.89722                     | 4.8688                      | 75812                       |                             | 7605                                                    |
| 90       | 400  | 0.89722                     | 4.8688                      | 71550                       |                             | 7177                                                    |
| 100      | 250  | 0.89722                     | 4.8688                      | 66361                       |                             | 7396                                                    |
| 100      | 350  | 0.89722                     | 4.8688                      | 70902                       |                             | 7902                                                    |
| 100      | 500  | 0.89722                     | 4.8688                      | 73741                       |                             | 8219                                                    |
| 200      | 250  | 0.89722                     | 4.8688                      | 37557                       | 78575                       | 8372                                                    |
| 200      | 350  | 0.89722                     | 4.8688                      | 38799                       | 80180                       | 8649                                                    |
| 200      | 500  | 0.89722                     | 4.8688                      | 39313                       | 78432                       | 8763                                                    |
| 300      | 300  | 0.89722                     | 4.8688                      | 27887                       | 55138                       | 9324                                                    |
| 300      | 400  | 0.89722                     | 4.8688                      | 27460                       | 55585                       | 9182                                                    |
| 300      | 500  | 0.89722                     | 4.8688                      | 28661                       | 58632                       | 9583                                                    |
| 400      | 350  | 0.89722                     | 4.8688                      | 20971                       | 42346                       | 9349                                                    |
| 400      | 500  | 0.89722                     | 4.8688                      | 21685                       | 43688                       | 9668                                                    |
| 400      | 750  | 0.89722                     | 4.8688                      | 21862                       | 44014                       | 9747                                                    |
| 500      | 350  | 0.89722                     | 4.8688                      | 16461                       | 33830                       | 9173                                                    |
| 500      | 500  | 0.89722                     | 4.8688                      | 16598                       | 35284                       | 9249                                                    |
| 500      | 750  | 0.89722                     | 4.8688                      | 17500                       | 38056                       | 9752                                                    |
| 600      | 500  | 0.89722                     | 4.8688                      | 14485                       | 30555                       | 9686                                                    |
| 600      | 750  | 0.89722                     | 4.8688                      | 15166                       | 31991                       | 10141                                                   |
| 600      | 1000 | 0.89722                     | 4.8688                      | 15767                       | 32413                       | 10543                                                   |
| 700      | 500  | 0.89722                     | 4.8688                      | 12892                       | 26173                       | 10058                                                   |
| 700      | 750  | 0.89722                     | 4.8688                      | 13515                       | 28093                       | 10544                                                   |
| 700      | 1000 | 0.89722                     | 4.8688                      | 14147                       | 29652                       | 11037                                                   |
| 800      | 500  | 0.89722                     | 4.8688                      | 11363                       | 23855                       | 10132                                                   |
| 800      | 750  | 0.89722                     | 4.8688                      | 12308                       | 25969                       | 10974                                                   |
| 800      | 1000 | 0.89722                     | 4.8688                      | 12330                       | 26645                       | 10994                                                   |
| 900      | 500  | 0.89722                     | 4.8688                      | 10747                       | 21242                       | 10780                                                   |
| 900      | 750  | 0.89722                     | 4.8688                      | 11486                       | 23028                       | 11522                                                   |
| 900      | 1000 | 0.89722                     | 4.8688                      | 12304                       | 27367                       | 12342                                                   |
| 1000     | 350  | 0.89722                     | 4.8688                      | 9548                        | 18813                       | 10642                                                   |
| 1000     | 500  | 0.89722                     | 4.8688                      | 9401                        | 18578                       | 10478                                                   |
| 1000     | 750  | 0.89722                     | 4.8688                      | 10620                       | 21269                       | 11837                                                   |
| 1000     | 1000 | 0.89722                     | 4.8688                      | 10566                       | 22547                       | 11776                                                   |

**Table S2** Experimental details showing frequency ( $f$ ), number of pulses ( $n$ ), monomer density ( $\rho$ ), monomer concentration ( $C_M$ ), the molecular weight at the inflection points ( $M_1$  and  $M_2$ ) and the calculated propagation constant ( $k_p^{apparent}$ ) at 20° C

| $f$ /Hz | $n$  | $\rho$ /g·mL <sup>-1</sup> | $C_M$ /mol·L <sup>-1</sup> | $M_1$ /g·mol <sup>-1</sup> | $M_2$ /g·mol <sup>-1</sup> | $k_p^{apparent}$ / L·mol <sup>-1</sup> ·s <sup>-1</sup> |
|---------|------|----------------------------|----------------------------|----------------------------|----------------------------|---------------------------------------------------------|
| 1       | 25   | 0.88481                    | 4.8015                     | 1578210                    |                            | 1784                                                    |
| 5       | 50   | 0.88481                    | 4.8015                     | 315032                     |                            | 1780                                                    |
| 10      | 50   | 0.88481                    | 4.8015                     | 111763                     |                            | 1263                                                    |
| 10      | 100  | 0.88481                    | 4.8015                     | 117111                     |                            | 1324                                                    |
| 10      | 150  | 0.88481                    | 4.8015                     | 108074                     |                            | 1221                                                    |
| 20      | 100  | 0.88481                    | 4.8015                     | 101401                     |                            | 2292                                                    |
| 20      | 200  | 0.88481                    | 4.8015                     | 95308                      |                            | 2154                                                    |
| 30      | 100  | 0.88481                    | 4.8015                     | 93537                      |                            | 3171                                                    |
| 30      | 150  | 0.88481                    | 4.8015                     | 93913                      |                            | 3184                                                    |
| 30      | 200  | 0.88481                    | 4.8015                     | 95759                      |                            | 3247                                                    |
| 40      | 100  | 0.88481                    | 4.8015                     | 77191                      |                            | 3490                                                    |
| 40      | 150  | 0.88481                    | 4.8015                     | 77141                      |                            | 3487                                                    |
| 40      | 200  | 0.88481                    | 4.8015                     | 82425                      |                            | 3726                                                    |
| 50      | 100  | 0.88481                    | 4.8015                     | 68862                      |                            | 3891                                                    |
| 50      | 150  | 0.88481                    | 4.8015                     | 67588                      |                            | 3819                                                    |
| 50      | 200  | 0.88481                    | 4.8015                     | 71068                      |                            | 4016                                                    |
| 60      | 150  | 0.88481                    | 4.8015                     | 78718                      |                            | 5338                                                    |
| 60      | 200  | 0.88481                    | 4.8015                     | 72765                      |                            | 4934                                                    |
| 70      | 150  | 0.88481                    | 4.8015                     | 87497                      |                            | 6922                                                    |
| 70      | 200  | 0.88481                    | 4.8015                     | 81722                      |                            | 6465                                                    |
| 70      | 250  | 0.88481                    | 4.8015                     | 75349                      |                            | 5961                                                    |
| 80      | 250  | 0.88481                    | 4.8015                     | 57259                      |                            | 5177                                                    |
| 90      | 150  | 0.88481                    | 4.8015                     | 63844                      |                            | 6494                                                    |
| 90      | 200  | 0.88481                    | 4.8015                     | 60501                      |                            | 6154                                                    |
| 90      | 250  | 0.88481                    | 4.8015                     | 75014                      |                            | 7630                                                    |
| 100     | 200  | 0.88481                    | 4.8015                     | 70494                      |                            | 7967                                                    |
| 100     | 250  | 0.88481                    | 4.8015                     | 68491                      |                            | 7741                                                    |
| 200     | 150  | 0.88481                    | 4.8015                     | 37998                      |                            | 8589                                                    |
| 200     | 200  | 0.88481                    | 4.8015                     | 40268                      |                            | 9102                                                    |
| 200     | 250  | 0.88481                    | 4.8015                     | 42779                      |                            | 9670                                                    |
| 300     | 200  | 0.88481                    | 4.8015                     | 33354                      | 68795                      | 11309                                                   |
| 300     | 250  | 0.88481                    | 4.8015                     | 34189                      | 67084                      | 11592                                                   |
| 300     | 300  | 0.88481                    | 4.8015                     | 35174                      | 70217                      | 11926                                                   |
| 400     | 250  | 0.88481                    | 4.8015                     | 28492                      | 54387                      | 12881                                                   |
| 400     | 350  | 0.88481                    | 4.8015                     | 28491                      | 53578                      | 12880                                                   |
| 400     | 500  | 0.88481                    | 4.8015                     | 28550                      | 53147                      | 12907                                                   |
| 500     | 350  | 0.88481                    | 4.8015                     | 23974                      | 45366                      | 13548                                                   |
| 500     | 500  | 0.88481                    | 4.8015                     | 24512                      |                            | 13852                                                   |
| 500     | 750  | 0.88481                    | 4.8015                     | 27872                      |                            | 15750                                                   |
| 600     | 350  | 0.88481                    | 4.8015                     | 18052                      | 38690                      | 12241                                                   |
| 600     | 500  | 0.88481                    | 4.8015                     | 20192                      | 36094                      | 13692                                                   |
| 700     | 350  | 0.88481                    | 4.8015                     | 16481                      | 33967                      | 13038                                                   |
| 700     | 500  | 0.88481                    | 4.8015                     | 16434                      | 32695                      | 13001                                                   |
| 700     | 750  | 0.88481                    | 4.8015                     | 17067                      | 29719                      | 13502                                                   |
| 800     | 350  | 0.88481                    | 4.8015                     | 14148                      | 30362                      | 12792                                                   |
| 800     | 500  | 0.88481                    | 4.8015                     | 15881                      | 30918                      | 14359                                                   |
| 800     | 750  | 0.88481                    | 4.8015                     | 16139                      | 28516                      | 14592                                                   |
| 900     | 350  | 0.88481                    | 4.8015                     | 13048                      | 27073                      | 13272                                                   |
| 900     | 500  | 0.88481                    | 4.8015                     | 13329                      | 28528                      | 13558                                                   |
| 900     | 750  | 0.88481                    | 4.8015                     | 13895                      | 28227                      | 14134                                                   |
| 1000    | 350  | 0.88481                    | 4.8015                     | 12219                      | 25429                      | 13810                                                   |
| 1000    | 500  | 0.88481                    | 4.8015                     | 11757                      | 26706                      | 13288                                                   |
| 1000    | 750  | 0.88481                    | 4.8015                     | 13552                      | 26316                      | 15316                                                   |
| 1000    | 1000 | 0.88481                    | 4.8015                     | 15611                      | 28535                      | 17643                                                   |

**Table S3** Experimental details showing frequency ( $f$ ), number of pulses ( $n$ ), monomer density ( $\rho$ ), monomer concentration ( $C_M$ ), the molecular weight at the inflection points ( $M_1$  and  $M_2$ ) and the calculated propagation constant ( $k_p^{\text{apparent}}$ ) at 30° C

| $f / (\text{Hz})$ | $n$  | $\rho / \text{g}\cdot\text{mL}^{-1}$ | $C_M / \text{mol}\cdot\text{L}^{-1}$ | $M_1 / \text{g}\cdot\text{mol}^{-1}$ | $M_2 / \text{g}\cdot\text{mol}^{-1}$ | $k_p^{\text{apparent}} / \text{L}\cdot\text{mol}^{-1}\cdot\text{s}^{-1}$ |
|-------------------|------|--------------------------------------|--------------------------------------|--------------------------------------|--------------------------------------|--------------------------------------------------------------------------|
| 10                | 100  | 0.87662                              | 4.7571                               | 579206                               |                                      | 6607                                                                     |
| 20                | 200  | 0.87662                              | 4.7571                               | 290860                               |                                      | 6637                                                                     |
| 60                | 100  | 0.87662                              | 4.7571                               | 115920                               |                                      | 7934                                                                     |
| 60                | 150  | 0.87662                              | 4.7571                               | 136126                               |                                      | 9317                                                                     |
| 60                | 200  | 0.87662                              | 4.7571                               | 122589                               |                                      | 8391                                                                     |
| 80                | 150  | 0.87662                              | 4.7571                               | 118492                               |                                      | 10813                                                                    |
| 100               | 150  | 0.87662                              | 4.7571                               | 126286                               |                                      | 14406                                                                    |
| 100               | 200  | 0.87662                              | 4.7571                               | 115628                               |                                      | 13190                                                                    |
| 100               | 250  | 0.87662                              | 4.7571                               | 121971                               |                                      | 13914                                                                    |
| 200               | 150  | 0.87662                              | 4.7571                               | 64321                                | 123621                               | 14675                                                                    |
| 200               | 200  | 0.87662                              | 4.7571                               | 63138                                | 121261                               | 14405                                                                    |
| 200               | 250  | 0.87662                              | 4.7571                               | 65813                                | 126111                               | 15015                                                                    |
| 300               | 200  | 0.87662                              | 4.7571                               | 43937                                | 86628                                | 15036                                                                    |
| 300               | 250  | 0.87662                              | 4.7571                               | 45263                                | 89670                                | 15490                                                                    |
| 300               | 300  | 0.87662                              | 4.7571                               | 44060                                | 86900                                | 15078                                                                    |
| 400               | 250  | 0.87662                              | 4.7571                               | 34111                                | 66714                                | 15565                                                                    |
| 400               | 350  | 0.87662                              | 4.7571                               | 34913                                | 65807                                | 15931                                                                    |
| 400               | 500  | 0.87662                              | 4.7571                               | 35723                                | 67249                                | 16300                                                                    |
| 500               | 350  | 0.87662                              | 4.7571                               | 28481                                | 53706                                | 16245                                                                    |
| 500               | 500  | 0.87662                              | 4.7571                               | 29264                                | 55728                                | 16691                                                                    |
| 500               | 750  | 0.87662                              | 4.7571                               | 29277                                |                                      | 16699                                                                    |
| 600               | 350  | 0.87662                              | 4.7571                               | 25240                                | 46283                                | 17275                                                                    |
| 600               | 500  | 0.87662                              | 4.7571                               | 25283                                | 48988                                | 17305                                                                    |
| 600               | 750  | 0.87662                              | 4.7571                               | 25215                                | 47520                                | 17258                                                                    |
| 700               | 350  | 0.87662                              | 4.7571                               | 21215                                | 39647                                | 16941                                                                    |
| 700               | 500  | 0.87662                              | 4.7571                               | 20964                                | 40721                                | 16740                                                                    |
| 700               | 750  | 0.87662                              | 4.7571                               | 21765                                | 40635                                | 17380                                                                    |
| 800               | 350  | 0.87662                              | 4.7571                               | 19236                                | 36588                                | 17555                                                                    |
| 800               | 500  | 0.87662                              | 4.7571                               | 19394                                | 36591                                | 17699                                                                    |
| 800               | 750  | 0.87662                              | 4.7571                               | 19528                                | 37841                                | 17821                                                                    |
| 900               | 350  | 0.87662                              | 4.7571                               | 16967                                | 32945                                | 17419                                                                    |
| 900               | 500  | 0.87662                              | 4.7571                               | 17583                                | 32539                                | 18052                                                                    |
| 900               | 750  | 0.87662                              | 4.7571                               | 19132                                | 37342                                | 19642                                                                    |
| 1000              | 350  | 0.87662                              | 4.7571                               | 16932                                | 32737                                | 19315                                                                    |
| 1000              | 500  | 0.87662                              | 4.7571                               | 16037                                | 31615                                | 18294                                                                    |
| 1000              | 750  | 0.87662                              | 4.7571                               | 16964                                | 34363                                | 19351                                                                    |
| 1000              | 1000 | 0.87662                              | 4.7571                               | 16359                                | 32992                                | 18661                                                                    |

**Table S4** Experimental details showing frequency ( $f$ ), number of pulses ( $n$ ), monomer density ( $\rho$ ), monomer concentration ( $C_M$ ), the molecular weight at the inflection points ( $M_1$  and  $M_2$ ) and the calculated propagation constant ( $k_p^{apparent}$ ) at 40° C

| $f$ / Hz | $n$  | $\rho$ / g·mL <sup>-1</sup> | $C_M$ / mol·L <sup>-1</sup> | $M_1$ / g·mol <sup>-1</sup> | $M_2$ / g·mol <sup>-1</sup> | $k_p^{apparent}$ / L·mol <sup>-1</sup> ·s <sup>-1</sup> |
|----------|------|-----------------------------|-----------------------------|-----------------------------|-----------------------------|---------------------------------------------------------|
| 1        | 12   | 0.86852                     | 4.7131                      | 249724                      |                             | 288                                                     |
| 5        | 25   | 0.86852                     | 4.7131                      | 189877                      |                             | 1093                                                    |
| 10       | 50   | 0.86852                     | 4.7131                      | 164990                      |                             | 1900                                                    |
| 20       | 50   | 0.86852                     | 4.7131                      | 127103                      |                             | 2927                                                    |
| 30       | 100  | 0.86852                     | 4.7131                      | 99140                       |                             | 3424                                                    |
| 30       | 150  | 0.86852                     | 4.7131                      | 109663                      |                             | 3788                                                    |
| 30       | 200  | 0.86852                     | 4.7131                      | 114194                      |                             | 3944                                                    |
| 40       | 100  | 0.86852                     | 4.7131                      | 85998                       |                             | 3961                                                    |
| 40       | 150  | 0.86852                     | 4.7131                      | 108426                      |                             | 4994                                                    |
| 40       | 200  | 0.86852                     | 4.7131                      | 101190                      |                             | 4660                                                    |
| 50       | 100  | 0.86852                     | 4.7131                      | 92669                       |                             | 5335                                                    |
| 50       | 150  | 0.86852                     | 4.7131                      | 93557                       |                             | 5386                                                    |
| 50       | 200  | 0.86852                     | 4.7131                      | 103076                      |                             | 5934                                                    |
| 60       | 150  | 0.86852                     | 4.7131                      | 97345                       |                             | 6725                                                    |
| 60       | 200  | 0.86852                     | 4.7131                      | 90939                       |                             | 6282                                                    |
| 60       | 250  | 0.86852                     | 4.7131                      | 86597                       |                             | 5982                                                    |
| 70       | 150  | 0.86852                     | 4.7131                      | 78934                       |                             | 6362                                                    |
| 70       | 200  | 0.86852                     | 4.7131                      | 83740                       |                             | 6749                                                    |
| 70       | 250  | 0.86852                     | 4.7131                      | 80671                       |                             | 6502                                                    |
| 80       | 150  | 0.86852                     | 4.7131                      | 77346                       |                             | 7124                                                    |
| 80       | 200  | 0.86852                     | 4.7131                      | 76569                       |                             | 7053                                                    |
| 80       | 250  | 0.86852                     | 4.7131                      | 99899                       |                             | 9202                                                    |
| 90       | 200  | 0.86852                     | 4.7131                      | 86993                       |                             | 9015                                                    |
| 90       | 250  | 0.86852                     | 4.7131                      | 93172                       |                             | 9655                                                    |
| 100      | 150  | 0.86852                     | 4.7131                      | 72877                       |                             | 8391                                                    |
| 100      | 200  | 0.86852                     | 4.7131                      | 66375                       |                             | 7642                                                    |
| 100      | 250  | 0.86852                     | 4.7131                      | 63865                       |                             | 7353                                                    |
| 200      | 150  | 0.86852                     | 4.7131                      | 54572                       |                             | 12567                                                   |
| 200      | 250  | 0.86852                     | 4.7131                      | 52141                       |                             | 12007                                                   |
| 300      | 200  | 0.86852                     | 4.7131                      | 45541                       |                             | 15731                                                   |
| 300      | 250  | 0.86852                     | 4.7131                      | 43737                       |                             | 15107                                                   |
| 300      | 300  | 0.86852                     | 4.7131                      | 43948                       |                             | 15180                                                   |
| 400      | 250  | 0.86852                     | 4.7131                      | 39801                       |                             | 18331                                                   |
| 400      | 350  | 0.86852                     | 4.7131                      | 36364                       |                             | 16748                                                   |
| 400      | 500  | 0.86852                     | 4.7131                      | 38749                       |                             | 17846                                                   |
| 500      | 350  | 0.86852                     | 4.7131                      | 33014                       |                             | 19006                                                   |
| 500      | 500  | 0.86852                     | 4.7131                      | 35157                       |                             | 20240                                                   |
| 600      | 350  | 0.86852                     | 4.7131                      | 28629                       |                             | 19778                                                   |
| 600      | 500  | 0.86852                     | 4.7131                      | 29574                       |                             | 20431                                                   |
| 700      | 350  | 0.86852                     | 4.7131                      | 25116                       | 43820                       | 20243                                                   |
| 700      | 500  | 0.86852                     | 4.7131                      | 25684                       |                             | 20701                                                   |
| 800      | 350  | 0.86852                     | 4.7131                      | 22115                       | 42292                       | 20370                                                   |
| 800      | 750  | 0.86852                     | 4.7131                      | 25818                       |                             | 23781                                                   |
| 900      | 350  | 0.86852                     | 4.7131                      | 19134                       | 38887                       | 19828                                                   |
| 900      | 500  | 0.86852                     | 4.7131                      | 21482                       | 42645                       | 22260                                                   |
| 900      | 750  | 0.86852                     | 4.7131                      | 24024                       | 39719                       | 24895                                                   |
| 1000     | 350  | 0.86852                     | 4.7131                      | 19116                       | 39719                       | 22010                                                   |
| 1000     | 750  | 0.86852                     | 4.7131                      | 20259                       | 37921                       | 23326                                                   |
| 1000     | 1000 | 0.86852                     | 4.7131                      | 22103                       | 38171                       | 25449                                                   |

**Table S5** Experimental details showing frequency ( $f$ ), number of pulses ( $n$ ), monomer density ( $\rho$ ), monomer concentration ( $C_M$ ), the molecular weight at the inflection points ( $M_1$  and  $M_2$ ) and the calculated propagation constant ( $k_p^{apparent}$ ) at 50° C

| $f$ / Hz | $n$ | $\rho$ / g·mL <sup>-1</sup> | $C_M$ / mol·L <sup>-1</sup> | $M_1$ / g·mol <sup>-1</sup> | $M_2$ / g·mol <sup>-1</sup> | $k_p^{apparent}$ / L·mol <sup>-1</sup> ·s <sup>-1</sup> |
|----------|-----|-----------------------------|-----------------------------|-----------------------------|-----------------------------|---------------------------------------------------------|
| 400      | 200 | 0.86049                     | 4.6695                      | 47788                       | 91942                       | 22214                                                   |
| 400      | 300 | 0.86049                     | 4.6695                      | 47847                       | 86365                       | 22242                                                   |
| 400      | 500 | 0.86049                     | 4.6695                      | 47123                       |                             | 21905                                                   |
| 500      | 250 | 0.86049                     | 4.6695                      | 36995                       | 74062                       | 21497                                                   |
| 500      | 350 | 0.86049                     | 4.6695                      | 39866                       | 76714                       | 23165                                                   |
| 500      | 500 | 0.86049                     | 4.6695                      | 38480                       |                             | 22359                                                   |
| 600      | 350 | 0.86049                     | 4.6695                      | 34489                       | 62612                       | 24048                                                   |
| 600      | 500 | 0.86049                     | 4.6695                      | 34224                       |                             | 23864                                                   |
| 600      | 650 | 0.86049                     | 4.6695                      | 35386                       |                             | 24674                                                   |
| 700      | 350 | 0.86049                     | 4.6695                      | 30506                       | 56962                       | 24816                                                   |
| 700      | 500 | 0.86049                     | 4.6695                      | 30151                       | 56297                       | 24528                                                   |
| 700      | 650 | 0.86049                     | 4.6695                      | 30847                       |                             | 25094                                                   |
| 800      | 350 | 0.86049                     | 4.6695                      | 27046                       | 51026                       | 25144                                                   |
| 800      | 500 | 0.86049                     | 4.6695                      | 27350                       | 51100                       | 25427                                                   |
| 800      | 650 | 0.86049                     | 4.6695                      | 26705                       | 48352                       | 24828                                                   |
| 900      | 350 | 0.86049                     | 4.6695                      | 23638                       | 46017                       | 24723                                                   |
| 900      | 500 | 0.86049                     | 4.6695                      | 25133                       | 45976                       | 26287                                                   |
| 900      | 650 | 0.86049                     | 4.6695                      | 25631                       | 48779                       | 26808                                                   |
| 1000     | 350 | 0.86049                     | 4.6695                      | 23214                       | 45439                       | 26978                                                   |
| 1000     | 500 | 0.86049                     | 4.6695                      | 23625                       | 42744                       | 27455                                                   |
| 1000     | 650 | 0.86049                     | 4.6695                      | 24820                       | 45266                       | 28844                                                   |
| 1000     | 800 | 0.86049                     | 4.6695                      | 25206                       | 46388                       | 29293                                                   |

**Table S6** Experimental details showing frequency ( $f$ ), number of pulses ( $n$ ), monomer density ( $\rho$ ), monomer concentration ( $C_M$ ), the molecular weight at the inflection points ( $M_1$  and  $M_2$ ) and the calculated propagation constant ( $k_p^{apparent}$ ) at 60° C

| $f$ / Hz | $n$ | $\rho$ / g·mL <sup>-1</sup> | $C_M$ / mol·L <sup>-1</sup> | $M_1$ / g·mol <sup>-1</sup> | $M_2$ / g·mol <sup>-1</sup> | $k_p^{apparent}$ / L·mol <sup>-1</sup> ·s <sup>-1</sup> |
|----------|-----|-----------------------------|-----------------------------|-----------------------------|-----------------------------|---------------------------------------------------------|
| 80       | 200 | 0.85253                     | 4.6263                      | 111334                      |                             | 10447                                                   |
| 500      | 350 | 0.85253                     | 4.6263                      | 42068                       |                             | 24672                                                   |
| 500      | 500 | 0.85253                     | 4.6263                      | 39448                       |                             | 23136                                                   |
| 600      | 350 | 0.85253                     | 4.6263                      | 37308                       |                             | 26257                                                   |
| 600      | 500 | 0.85253                     | 4.6263                      | 39309                       |                             | 27665                                                   |
| 600      | 650 | 0.85253                     | 4.6263                      | 34997                       |                             | 24630                                                   |
| 700      | 350 | 0.85253                     | 4.6263                      | 37541                       |                             | 30824                                                   |
| 800      | 350 | 0.85253                     | 4.6263                      | 31519                       |                             | 29577                                                   |
| 800      | 500 | 0.85253                     | 4.6263                      | 35253                       |                             | 33081                                                   |
| 800      | 650 | 0.85253                     | 4.6263                      | 33492                       |                             | 31428                                                   |
| 900      | 350 | 0.85253                     | 4.6263                      | 29505                       | 54502                       | 31148                                                   |
| 900      | 500 | 0.85253                     | 4.6263                      | 30188                       | 52887                       | 31869                                                   |
| 900      | 650 | 0.85253                     | 4.6263                      | 30129                       |                             | 31087                                                   |
| 1000     | 350 | 0.85253                     | 4.6263                      | 27058                       | 51671                       | 31738                                                   |
| 1000     | 500 | 0.85253                     | 4.6263                      | 27279                       | 49661                       | 31998                                                   |
| 1000     | 650 | 0.85253                     | 4.6263                      | 28139                       | 49509                       | 33006                                                   |
| 1000     | 800 | 0.85253                     | 4.6263                      | 27522                       |                             | 32283                                                   |

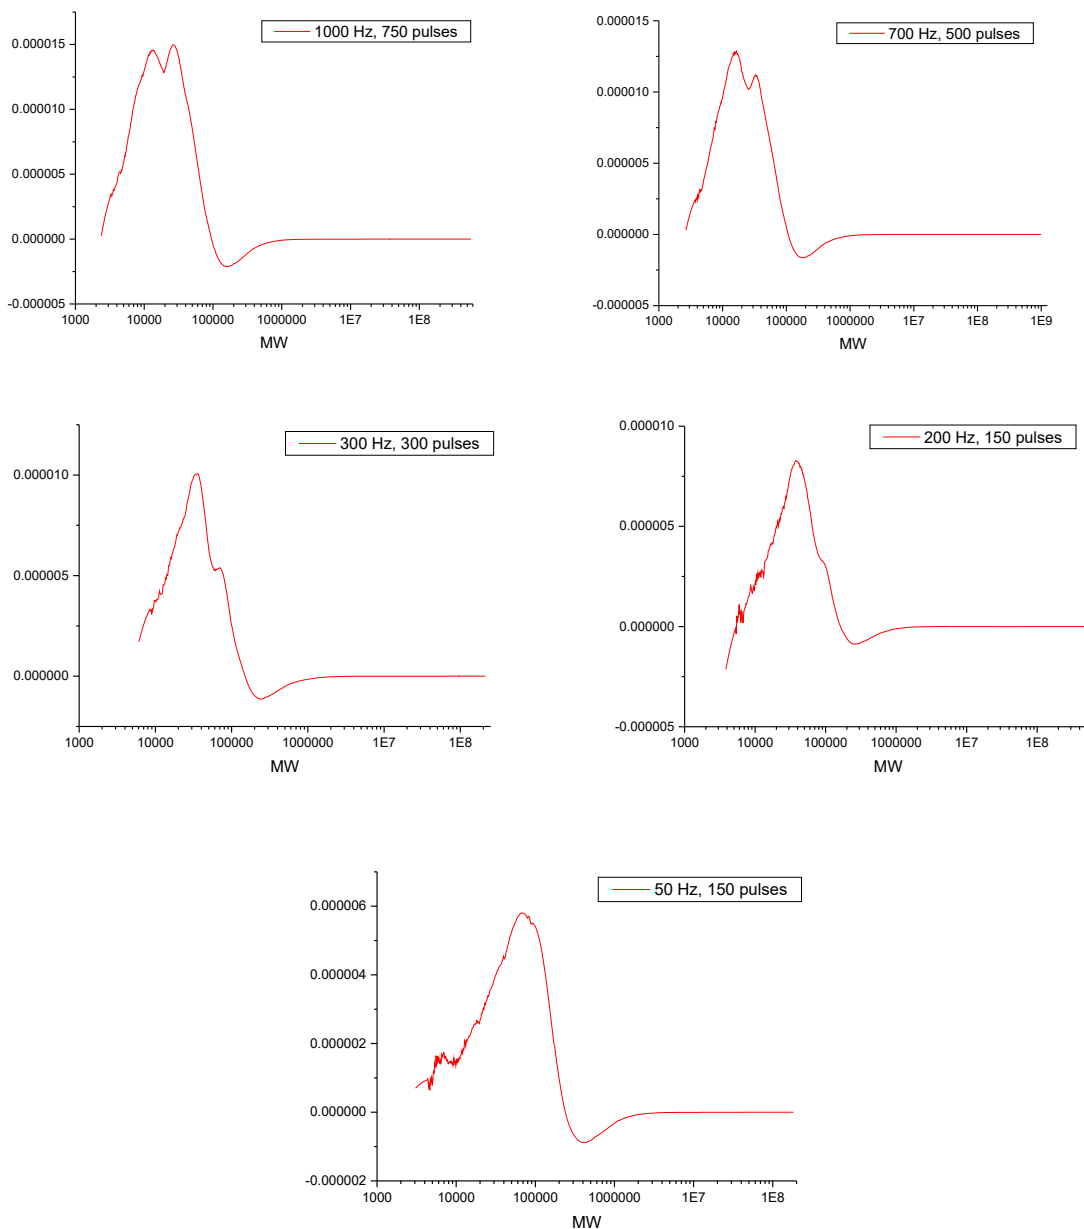

**Figure S1** Representative first derivative PLP-SEC traces for experiments with decreasing pulse repetition rate. Graphs shown are obtained for PLP-SEC at 20 °C. Experiments at higher temperatures show an earlier breakdown of the typical overtone-type structures.

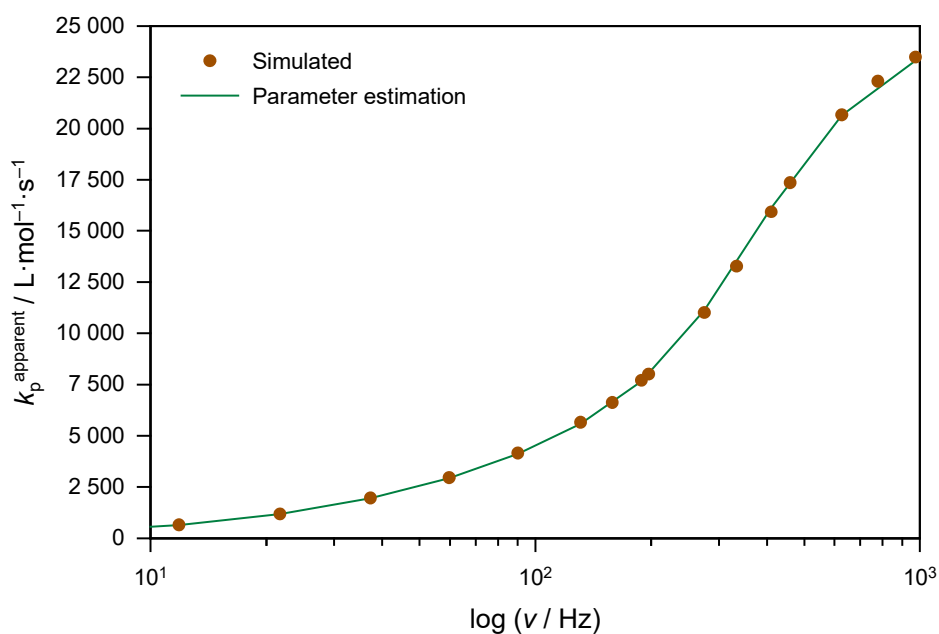

**Figure S2** Example for parameter estimation testing. The plot shows simulated data (brown dots) for 50 °C which have in the following been fitted via Predici parameter estimation to test if the correct input parameters are obtained. As is seen, a good fit is obtained, returning the original input simulation data with very high accuracy (see Table S7 for more examples)

**Table S7** Comparison of fit parameters obtained from Predici-parameter estimation with the original input parameters of the model. Ideally, if the parameter estimation procedure is robust, and the fit parameters are not correlated, then the fit procedure will return the simulation input. If fit parameters were correlated than different set of values would be obtained. Error limits given are for 95% confidence intervals.

| <i>Simulation Input</i>                                                 |                                                                      | <i>Parameter Estimation Return</i>                                      |                                                                      |
|-------------------------------------------------------------------------|----------------------------------------------------------------------|-------------------------------------------------------------------------|----------------------------------------------------------------------|
| $k_p^{\text{average}} / \text{L}\cdot\text{mol}^{-1}\cdot\text{s}^{-1}$ | $k_p^{\text{tert}} / \text{L}\cdot\text{mol}^{-1}\cdot\text{s}^{-1}$ | $k_p^{\text{average}} / \text{L}\cdot\text{mol}^{-1}\cdot\text{s}^{-1}$ | $k_p^{\text{tert}} / \text{L}\cdot\text{mol}^{-1}\cdot\text{s}^{-1}$ |
| 333                                                                     | 10                                                                   | 333 ± 21                                                                | 10.0 ± 7.8                                                           |
| 1000                                                                    | 10                                                                   | 1070 ± 140                                                              | 10.8 ± 1.9                                                           |
| 3000                                                                    | 10                                                                   | 3880 ± 440                                                              | 14.3 ± 2.7                                                           |
| 5000                                                                    | 10                                                                   | 7210 ± 540                                                              | 18.7 ± 2.9                                                           |
| 333                                                                     | 50                                                                   | 334 ± 27                                                                | 50.2 ± 7.1                                                           |
| 1000                                                                    | 50                                                                   | 992 ± 27                                                                | 49.8 ± 2.1                                                           |
| 3000                                                                    | 50                                                                   | 3010 ± 350                                                              | 50.6 ± 11.0                                                          |
| 5000                                                                    | 50                                                                   | 5080 ± 180                                                              | 52.4 ± 4.4                                                           |
